# Supplementary material for: Riluzole exerts distinct antitumor effects from a metabotropic glutamate receptor 1-specific inhibitor on breast cancer cells
Source: PubMed Central journal article supplement (PMC5546507; doi:10.18632/oncotarget.17961), 2017-05-18
Supplement: oncotarget-08-44639-s001.pdf [file oncotarget-08-44639-s001.pdf]

# Riluzole exerts distinct antitumor effects from a metabotropic glutamate receptor 1-specific inhibitor on breast cancer cells

## SUPPLEMENTARY MATERIALS

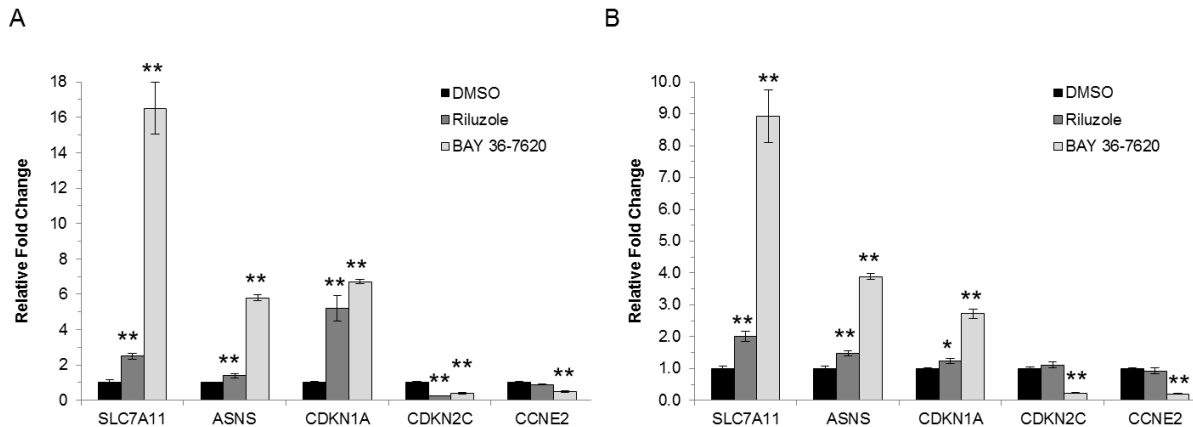

**Supplementary Figure 1: RT-PCR validation of gene expression microarray.** A two-step RT-PCR was performed on RNA isolated from MCF-7 (A) and BT-474 (B) cells for genes up- (SLC7A11, ASNS, CDKN1A) or down-regulated (CDKN2C, CCNE2) by gene expression microarray. Gene expression is shown as relative fold change compared to DMSO control. \*P < 0.05 compared to DMSO control. \*\*P < 0.005 compared to DMSO control. Data are represented as mean +/- SD.

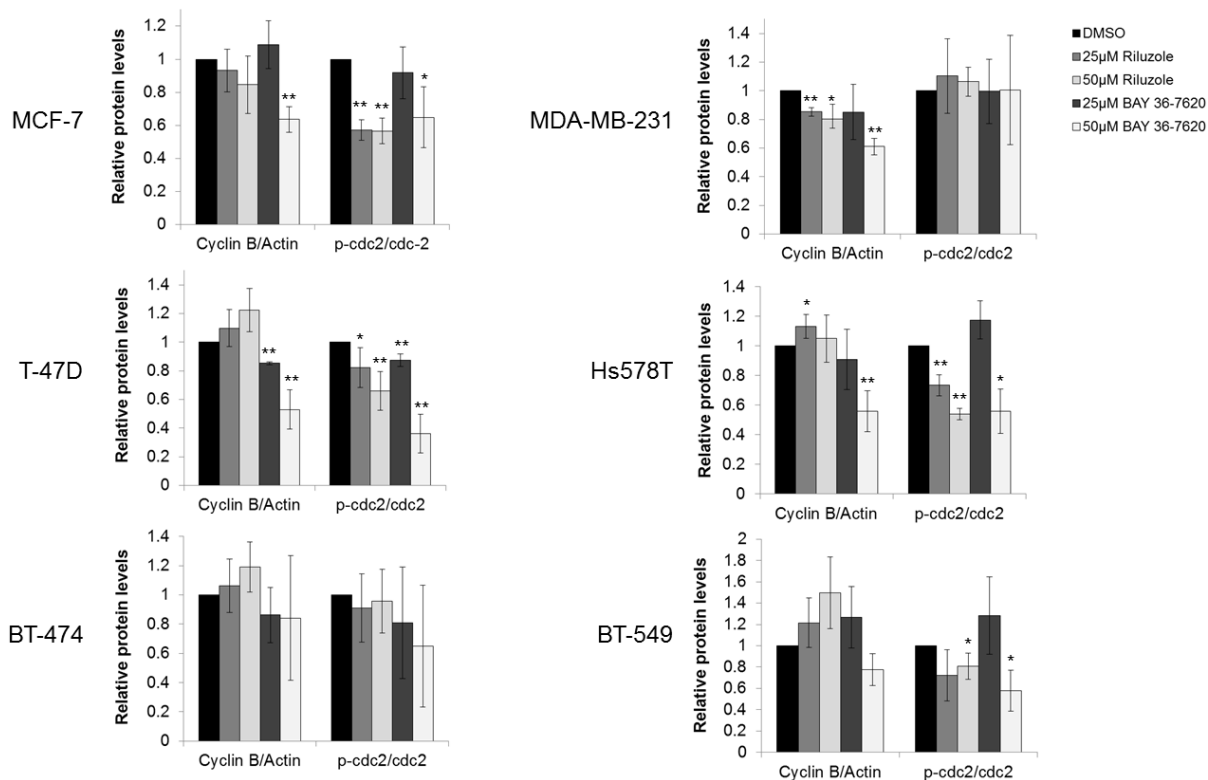

**Supplementary Figure 2: Phospho-cdc2 and cyclin B1 expression are significantly altered by treatment with riluzole or BAY 36-7620.** Phospho-cdc2 (Tyr 15; p-cdc2) and cyclin B1 expression were measured by Western blot after 24 h (Hs578T, BT-549) or 48 h (MCF-7, T-47D, BT-474, MDA-MB-231) drug treatment.  $\beta$ -actin and cdc-2 served as loading controls for cyclin B1 and p-cdc2 respectively. Densitometry of bands from three independent experiments and normalization to controls are shown. \* $P < 0.05$  compared to DMSO control. \*\* $P < 0.005$  compared to DMSO control. Data are represented as mean  $\pm$  SD.

**Supplementary Table 1: Statistical analysis of microarray gene signatures up- or down-regulated by riluzole or BAY 36-7620 (p-values shown)**

| Gene Signature*                | MCF-7    |             | BT-474   |             | BT-549   |             |
|--------------------------------|----------|-------------|----------|-------------|----------|-------------|
|                                | Riluzole | BAY 36-7620 | Riluzole | BAY 36-7620 | Riluzole | BAY 36-7620 |
| Cholesterol biosynthesis       | 0.311    | 0.379       | 0.344    | 0.001       | 0.008    | 0.205       |
| Fatty acid beta-oxidation      | 0.318    | 0.067       | 0.133    | 0.274       | 0.191    | 0.248       |
| Oxidative phosphorylation      | 0.234    | 0.147       | 0.040    | 0.025       | 0.028    | 0.109       |
| Glycolysis                     | 0.159    | 0.220       | 0.150    | 0.224       | 0.186    | 0.556       |
| Autophagy                      | 0.025    | 0.009       | 0.286    | 0.375       | 0.181    | 0.110       |
| TFEB targets                   | < 0.001  | 0.141       | 0.067    | 0.082       | 0.012    | 0.003       |
| NFκB activation                | < 0.001  | < 0.001     | 0.257    | 0.135       | 0.029    | 0.092       |
| RAS activation                 | 0.002    | 0.021       | 0.284    | 0.082       | < 0.001  | < 0.001     |
| HIF1 alpha targets             | 0.025    | 0.251       | 0.080    | 0.268       | 0.055    | 0.036       |
| TGF beta pathway               | 0.254    | 0.102       | 0.435    | 0.123       | 0.054    | 0.075       |
| Wnt pathway                    | 0.389    | 0.392       | 0.504    | 0.211       | 0.068    | 0.390       |
| Myc targets                    | 0.006    | 0.084       | 0.162    | 0.033       | 0.056    | 0.181       |
| PTEN inactivation              | < 0.001  | 0.004       | 0.099    | 0.003       | 0.010    | 0.024       |
| p53 inactivation               | 0.054    | 0.063       | 0.165    | 0.007       | 0.456    | 0.009       |
| Response to wounding           | 0.132    | 0.535       | 0.127    | 0.081       | 0.185    | 0.015       |
| Inflammatory response          | 0.013    | 0.022       | 0.008    | 0.098       | 0.019    | 0.050       |
| Cytokine production            | 0.096    | 0.080       | 0.302    | 0.320       | 0.313    | 0.235       |
| Angiogenesis                   | 0.108    | 0.194       | 0.035    | 0.024       | 0.287    | 0.212       |
| Cell migration                 | 0.373    | 0.543       | 0.049    | 0.124       | 0.474    | 0.352       |
| Cell adhesion                  | 0.242    | 0.268       | 0.077    | 0.022       | 0.239    | 0.679       |
| Cell junction organization     | 0.233    | 0.158       | 0.246    | 0.329       | 0.502    | 0.364       |
| Cell division                  | < 0.001  | 0.002       | 0.091    | 0.016       | 0.044    | < 0.001     |
| Telomere organization          | 0.007    | 0.023       | 0.140    | 0.027       | 0.044    | 0.090       |
| Chromosome segregation         | < 0.001  | 0.003       | 0.142    | 0.010       | 0.126    | 0.009       |
| M phase of mitotic cell cycle  | < 0.001  | 0.001       | 0.031    | < 0.001     | 0.003    | < 0.001     |
| G2/M transition                | < 0.001  | 0.003       | 0.538    | 0.080       | 0.342    | 0.031       |
| G2 phase of mitotic cell cycle | 0.056    | 0.097       | 0.046    | 0.075       | 0.182    | 0.049       |
| DNA packaging                  | 0.006    | 0.010       | 0.247    | 0.018       | 0.264    | 0.009       |
| DNA replication                | < 0.001  | < 0.001     | 0.063    | 0.001       | < 0.001  | 0.021       |
| S phase of mitotic cell cycle  | 0.041    | 0.040       | 0.114    | < 0.001     | < 0.001  | 0.011       |
| G1/S transition                | 0.030    | 0.072       | 0.155    | 0.002       | < 0.001  | 0.039       |
| G1 phase of mitotic cell cycle | 0.095    | 0.131       | 0.433    | 0.349       | 0.313    | 0.143       |

\* TFEB:transcription factor EB; NFκB: nuclear factor kappa-light-chain-enhancer of activated B cells; HIF1: alphahypoxia-inducible factor 1-alpha; TGF: beta-transforming growth factor beta; PTEN: phosphatase and tensin homolog

Supplementary Table 2: Validation of microarray gene expression profiling using quantitative RT-PCR

| Gene <sup>†</sup> | MCF-7              |            |                    |             | BT-474             |            |                    |            | BT-549             |            |                    |            |
|-------------------|--------------------|------------|--------------------|-------------|--------------------|------------|--------------------|------------|--------------------|------------|--------------------|------------|
|                   | Riluzole/DMSO      |            | BAY 36-7620/DMSO   |             | Riluzole/DMSO      |            | BAY 36-7620/DMSO   |            | Riluzole/DMSO      |            | BAY 36-7620/DMSO   |            |
|                   | Fold change        |            | Fold change        |             | Fold change        |            | Fold change        |            | Fold change        |            | Fold change        |            |
|                   | Microarray qRT-PCR |            | Microarray qRT-PCR |             | Microarray qRT-PCR |            | Microarray qRT-PCR |            | Microarray qRT-PCR |            | Microarray qRT-PCR |            |
| SLC7A11           | 1.1 (0.15)*        | 2.5 (0.18) | 1.4 (0.16)         | 16.5 (1.47) | 1.3 (0.17)         | 2.0 (0.17) | 10.0 (1.38)        | 8.9 (0.83) | 2.7 (0.11)         | 2.9 (0.33) | 3.4 (0.19)         | 4.2 (0.73) |
| ASNS              | 5.4 (0.48)         | 1.4 (0.12) | 11.5 (1.08)        | 5.8 (0.17)  | 1.2 (0.08)         | 1.5 (0.07) | 4.3 (0.04)         | 3.9 (0.10) | 2.9 (0.01)         | 3.1 (0.17) | 4.2 (0.05)         | 5.3 (0.49) |
| CDKN1A            | 1.0 (0.09)         | 5.2 (0.70) | 1.0 (0.11)         | 6.7 (0.12)  | 1.1 (0.09)         | 1.2 (0.08) | 2.7 (0.09)         | 2.7 (0.15) | 1.9 (0.02)         | 1.9 (0.15) | 3.0 (0.18)         | 3.8 (0.23) |
| CDKN2C            | 0.5 (0.01)         | 0.3 (0.01) | 0.2 (0.01)         | 0.4 (0.04)  | 1.0 (0.04)         | 1.1 (0.09) | 0.3 (0.03)         | 0.2 (0.02) | 0.7 (0.03)         | 0.5 (0.03) | 0.2 (0.01)         | 0.1 (0.01) |
| CCNE2             | 1.0 (0.05)         | 0.9 (0.04) | 1.1 (0.09)         | 0.5 (0.04)  | 0.8 (0.04)         | 0.9 (0.10) | 0.3 (0.02)         | 0.2 (0.02) | 0.4 (0.004)        | 0.4 (0.08) | 0.4 (0.03)         | 0.5 (0.05) |

<sup>†</sup> SLC7A11: solute carrier family 7 member 11; ASNS: asparagine synthetase (glutamine-hydrolyzing); CDKN1A: cyclin E2

\* Values in parentheses represent +/- standard deviation

**Supplementary Table 3: Effect of riluzole on water-soluble metabolite levels**

See Supplementary File 1
